# Supplementary material for: Porphyrin-based metallopolymers: synthesis, characterization and pyrolytic study for the generation of magnetic metal nanoparticles
Source: Royal Society of Chemistry journal article supplement (doi:10.1039/c6tc00145a), 2016-01-01
Supplement: c6tc00145a1.pdf [file c6tc00145a1.pdf]

## Electronic Supplementary Information

### **Porphyrin-based metallopolymers: synthesis, characterization and pyrolytic study for the generation of carbon-coated magnetic monometallic or metal alloy nanoparticles**

**Qingchen Dong,<sup>\*a</sup> Wenshan Qu,<sup>b</sup> Wenqing Liang,<sup>a</sup> Feifei Tai,<sup>a</sup> Kunpeng Guo,<sup>a</sup> Chi-Wah Leung,<sup>c</sup>  
Yih Hsing Lo,<sup>\*d</sup> Wai-Yeung Wong<sup>\*a,e</sup>**

<sup>a</sup>MOE Key Laboratory for Interface Science and Engineering in Advanced Materials and Research Center of Advanced Materials Science and Technology, Taiyuan University of Technology, 79 Yingze West Street, Taiyuan 030024, P.R. China.

<sup>b</sup>Institute of Carbon Materials Science, Shanxi Datong University, Datong 037009, P. R. China.

<sup>c</sup>Department of Applied Physics, Hong Kong Polytechnic University, Hung Hom, Hong Kong, P. R. China.

<sup>d</sup>Department of Applied Physics and Chemistry, University of Taipei, Taipei 100, Taiwan.

<sup>e</sup>Institute of Molecular Functional Materials, Department of Chemistry and Partner State Key Laboratory of Environmental and Biological Analysis, Hong Kong Baptist University, Waterloo Road, Kowloon Tong, Hong Kong, P.R. China.

\*E-mail: dongqingchen@tyut.edu.cn; yhlo@utapei.edu.tw; rwywong@hkbu.edu.hk

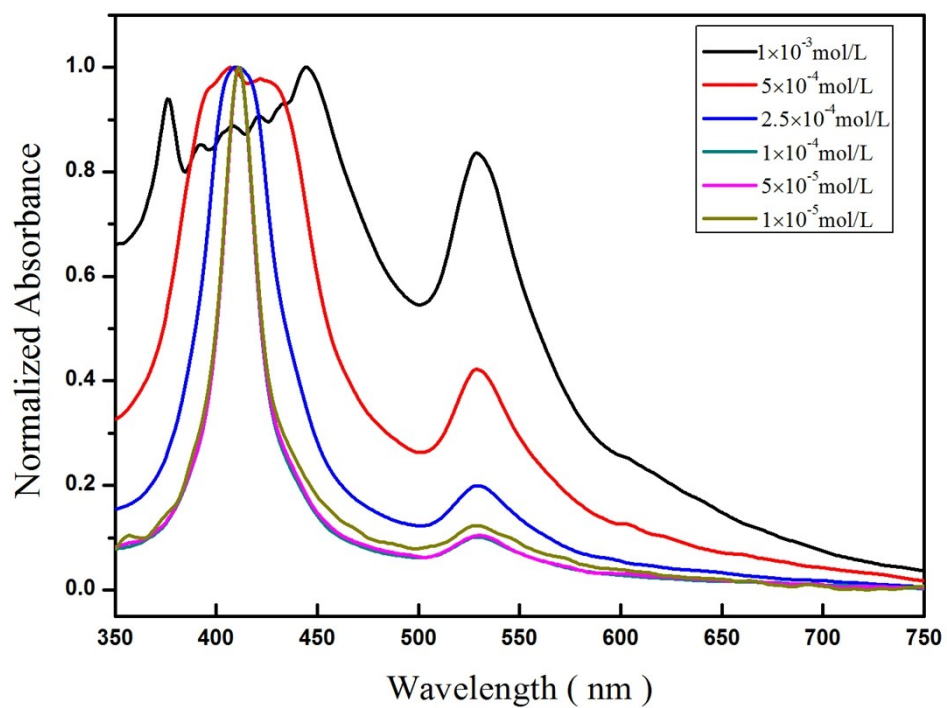

**Figure S1.** Concentration-dependent UV-Vis spectra of DETPP-P-Co ( $\text{CH}_2\text{Cl}_2$ , 298 K).
